# Supplementary material
Source: ML conference proceedings conference paper supplement (https://openaccess.thecvf.com/content/CVPR2023/html/Kim_NeuralField-LDM_Scene_Generation_CVPR_2023_paper.html)
Supplement: Supplementary file 1 [file Kim_NeuralField-LDM_Scene_Generation_CVPR_2023_supplemental.zip]

Archive with 5 entries (4 files):
- NFLDM_supplementary/
- NFLDM_supplementary/NFLDM_supp_text.pdf
- __MACOSX/NFLDM_supplementary/._NFLDM_supp_text.pdf
- NFLDM_supplementary/NFLDM_supp_video.mp4
- __MACOSX/NFLDM_supplementary/._NFLDM_supp_video.mp4
